# Supplementary material for: Two functional reticulocyte binding-like (RBL) invasion ligands of zoonotic Plasmodium knowlesi exhibit differential adhesion to monkey and human erythrocytes
Source: PubMed Central journal article supplement (PMC3464698; doi:10.1186/1475-2875-11-228), 2012-07-06
Supplement: 1475-2875-11-228-S1.pdf [file 1475-2875-11-228-S1.pdf]

## Additional File 1. Primer sequences for regions cloned into pDisplay vector

| Gene    | Region          | Primer Sequence                                                                                 |
|---------|-----------------|-------------------------------------------------------------------------------------------------|
| pknbpxb | I (pDisplay)    | Sense: 5'-ccccagatctTCATGTAAGGACAATAATAG-3'<br>Antisense: 5'-ccccgtcgacTAGAAATGACGTAATATCTC-3'  |
|         | II (pDisplay)   | Sense: 5'-ccccagatctACACAAGTGAATAATTTGGA-3'<br>Antisense: 5'-ccccgtcgacATTGGAATAAAGAATATGTTC-3' |
|         | III (pDisplay)  | Sense: 5'-ccccagatctAGAGATATTACGTCATTTCT-3'<br>Antisense: 5'-ccccgtcgacGTATTCTTTTATCAACGTGT-3'  |
|         | IV (pDisplay)   | Sense: 5'-ccccagatctGAACATATTCTTTATTCCAAT-3'<br>Antisense: 5'-ccccgtcgacGGTACTTTCCTTATTAACAA-3' |
|         | V (pDisplay)    | Sense: 5'-ccccagatctGACACGTTGATAAAAGAATA-3'<br>Antisense: 5'-ccccgtcgacGTCCACAAGGGATGATTT-3'    |
|         | VI (pDisplay)   | Sense: 5'-ccccagatctGTTGTTAATAAGGAAAGTAC-3'<br>Antisense: 5'-ccccgtcgacGAACATTTCCATATACGAAT-3'  |
|         | VII (pDisplay)  | Sense: 5'-ccccagatctTCATCCCTTGTGGACATG-3'<br>Antisense: 5'-ccccgtcgacGTAGACATCTTCTGTTCC-3'      |
|         | VIII (pDisplay) | Sense: 5'-ccccagatctGATTCGTATATGGAAATGTT-3'<br>Antisense: 5'-ccccgtcgacGTCCACATTATTAGAATTATT-3' |
